# Supplementary figures and images for: Associations of movement behaviours and dietary intake with arterial stiffness: results from the ORISCAV-LUX 2 cross-sectional study
Source: PubMed Central journal article supplement — BMJ Open. 2024 Jul 26;14(7):e084933. doi: 10.1136/bmjopen-2024-084933 (PMC11287072; doi:10.1136/bmjopen-2024-084933), 2024-07-26

## Supplementary material

Figure S1. Flowchart of the participants inclusion process.

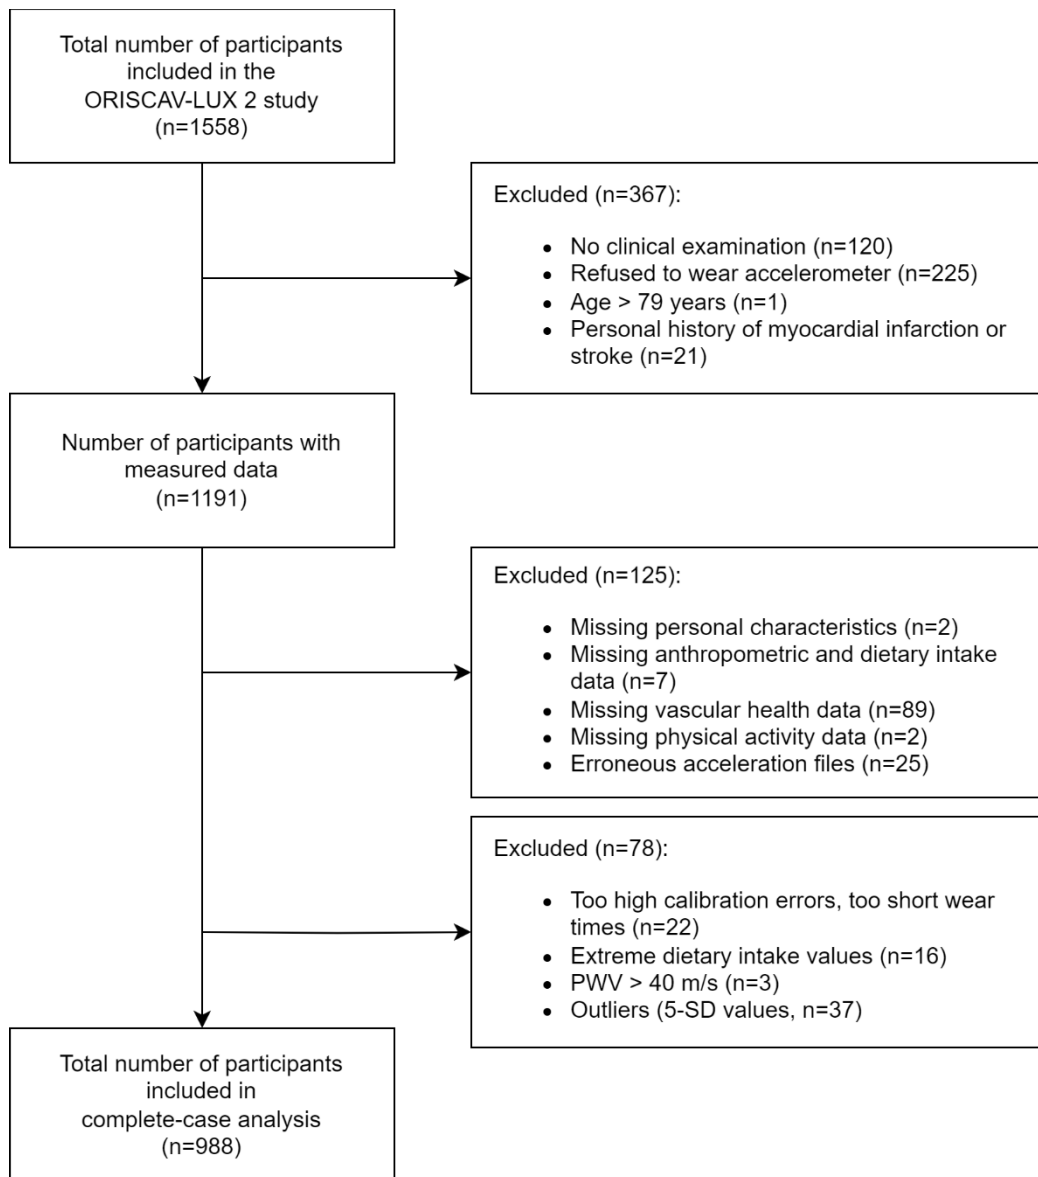

Supplement: bmjopen-14-7-s001.pdf [file bmjopen-14-7-s001.pdf]
